# Supplementary material for: Constraint randomised non-negative factor analysis (CRNNFA): an alternate chemometrics approach for analysing the biochemical data sets
Source: Royal Society of Chemistry journal article supplement (doi:10.1039/c7an00274b), 2017-01-01
Supplement: c7an00274b1.pdf [file c7an00274b1.pdf]

## Supplementary Information

### **Constraint randomised non-negative factor analysis (CRNNFA): An alternate chemometrics approach for analysing the biochemical data sets**

**Keshav Kumar and Felipe Cava\***

Laboratory for Molecular Infection Medicine Sweden, Department of Molecular Biology,  
Umeå Centre for Microbial Research, Umeå University, 90187 Umeå, Sweden.

\* Email: felipe.cava@molbiol.umu.se

### Figure

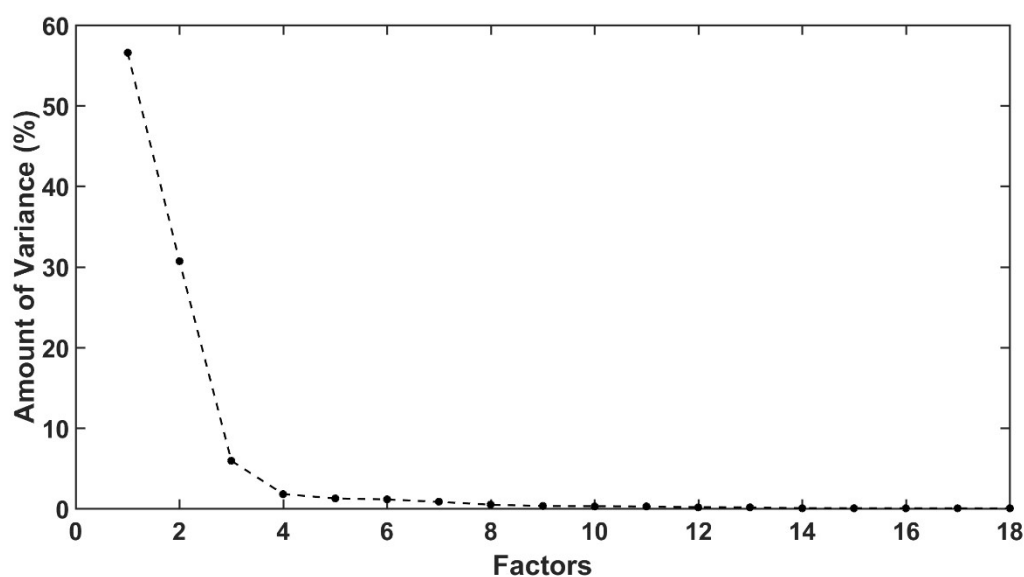

Figure S1. SVD analysis showing the amount of variance captured by different factors. The first four factors accounting for more than 90 percent variance is taken as the optimum for performing the CRNNFA.
